# Supplementary material
Source: PubMed Central journal article supplement (PMC5972633)

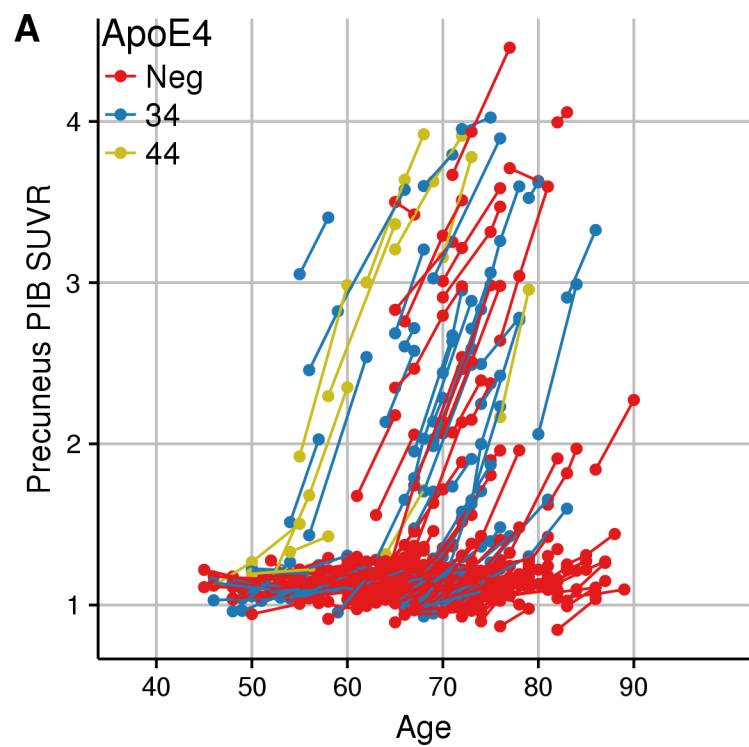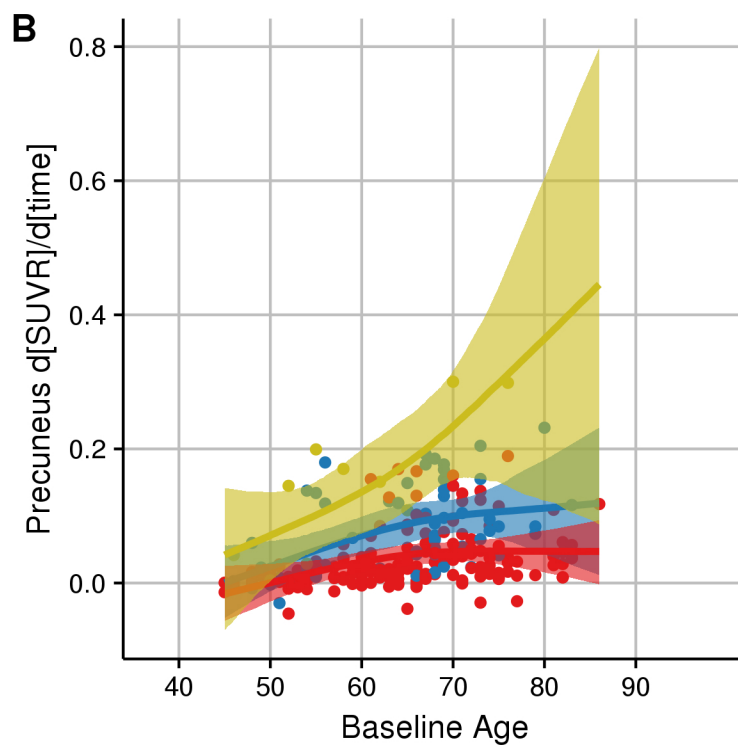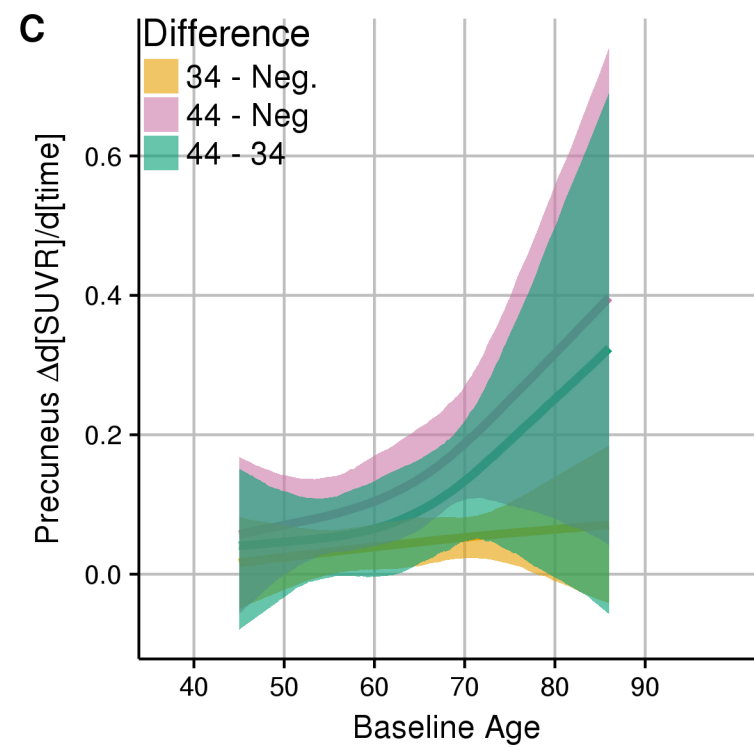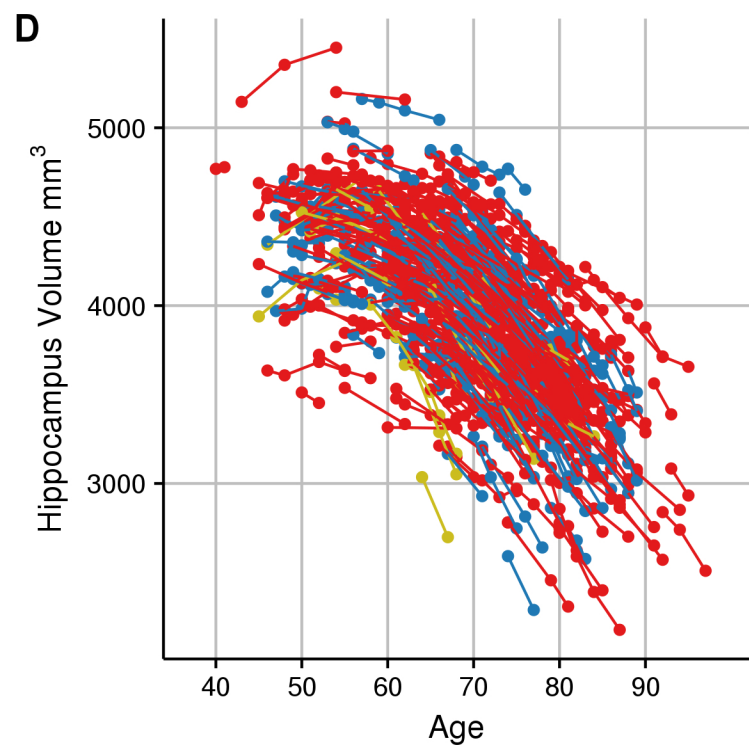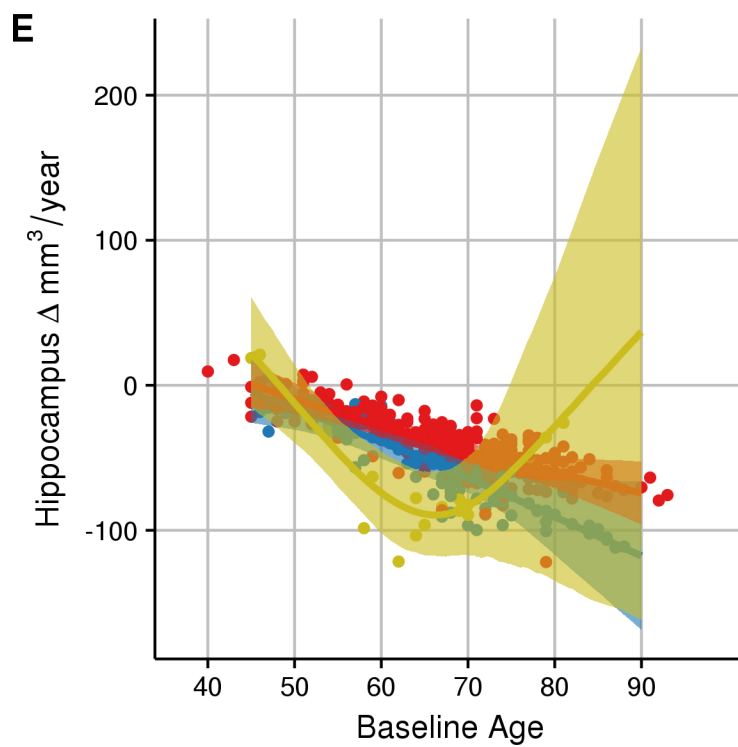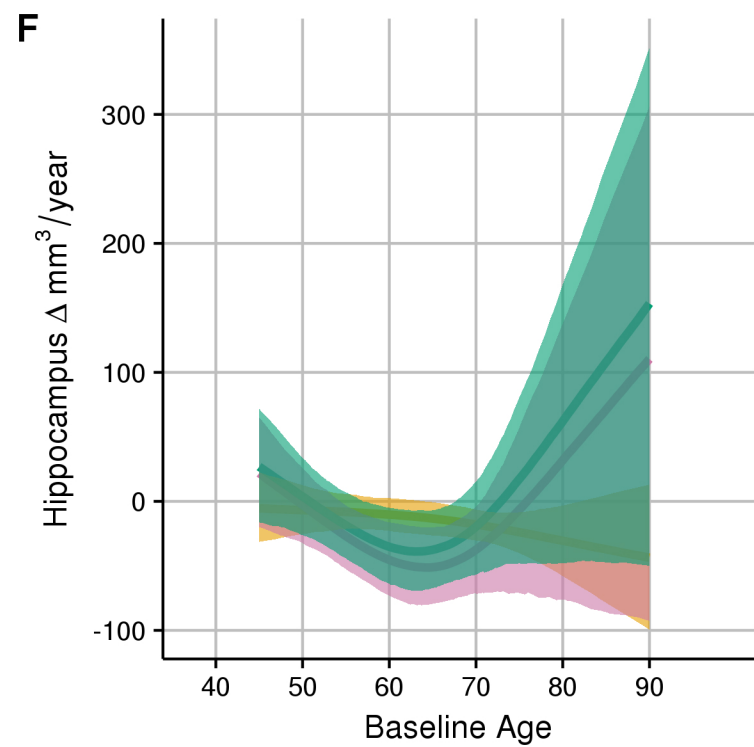

Supplement: awy103_brain-2017-01630-file009.pdf [file awy103_brain-2017-01630-file009.pdf]
